# Supplementary material for: Facile Synthesis of Fe-Doped, Algae Residue-Derived Carbon Aerogels for Electrochemical Dopamine Biosensors
Source: MDPI journal article supplement (doi:10.3390/s24092787), 2024-04-27
Supplement: s1 [file s1]

# SUPPLEMENTARY MATERIAL

## **Facile synthesis of Fe-doped algae residue-derived carbon aerogels for electrochemical dopamine biosensors**

Hao Wu<sup>1,#</sup>, Qin Wen<sup>1,#</sup>, Xin Luan<sup>2</sup>, Weiwei Yang<sup>1</sup>, Lei Guo<sup>1,\*</sup> and Gang Wei<sup>2,\*</sup>

*1 Institute of Biomedical Engineering, College of Life Science, Qingdao University, Qingdao 266071, P.R. China*

*2 College of Chemistry and Chemical Engineering, Qingdao University, Qingdao 266071, P. R. China*

Correspondence: [guoleibio@qdu.edu.cn](mailto:guoleibio@qdu.edu.cn) (L.G.); [weigroup@qdu.edu.cn](mailto:weigroup@qdu.edu.cn) (G.W.),  
Tel.: 0086-15066242101

# SUPPLEMENTARY MATERIAL

**Table S1.** The oxidation and reduction peak current of various electrodes in CV testing in 0.1 M KCl solution containing 1.0 mM of  $[\text{Fe}(\text{CN})_6]^{3-/4-}$ .

| Electrode                                  | Bare GCE | CAs/GCE | CAs/GCE-Fe-700 | CAs/GCE-Fe-1000 |
|--------------------------------------------|----------|---------|----------------|-----------------|
| Current- $I_{\text{pc}}$ ( $\mu\text{A}$ ) | 0.681    | 23.03   | 27.04          | 56.78           |
| Current- $I_{\text{pa}}$ ( $\mu\text{A}$ ) | -1.07    | -22.92  | -25.24         | -64.12          |

**Table S2.** The oxidation and reduction peak current of various electrodes in CV testing in the presence of 30  $\mu\text{M}$  DA in PBS (pH = 7.0).

| Electrode                                  | Bare GCE | CAs/GCE | CAs/GCE-Fe-700 | CAs/GCE-Fe-1000 |
|--------------------------------------------|----------|---------|----------------|-----------------|
| Current- $I_{\text{pc}}$ ( $\mu\text{A}$ ) | 1.5      | 12.1    | 83.7           | 108.6           |
| Current- $I_{\text{pa}}$ ( $\mu\text{A}$ ) | -1.1     | -13.6   | -94.5          | -114            |

**Table S3.** The RSD value of oxidation and reduction peak current under different scan rate ( $\text{V}^{1/2}$ ) for CAs/GCE-Fe-1000.

| Scan Rate ( $\text{V}^{1/2}$ ) | RSD ( $I_{\text{pc}}$ ) % | RSD ( $I_{\text{pa}}$ ) % |
|--------------------------------|---------------------------|---------------------------|
| 4.47                           | 2.408                     | 1.620                     |
| 6.32                           | 1.291                     | 1.704                     |
| 7.75                           | 3.012                     | 1.342                     |
| 8.94                           | 2.003                     | 2.079                     |
| 10                             | 3.911                     | 2.082                     |
| 10.95                          | 3.921                     | 2.030                     |
| 11.83                          | 4.726                     | 2.707                     |
| 12.65                          | 4.509                     | 2.525                     |
| 13.42                          | 2.203                     | 3.717                     |
| 14.14                          | 2.563                     | 3.403                     |

# SUPPLEMENTARY MATERIAL

**Table S4.** The RSD value of oxidation and reduction peak current under different DA concentration.

| DA concentration<br>( $\mu\text{M}$ ) | RSD of CAs<br>(%)      | RSD of<br>CAs/GCE-Fe-<br>700 (%) | RSD of<br>CAs/GCE-<br>Fe-1000 (%) |
|---------------------------------------|------------------------|----------------------------------|-----------------------------------|
| 0.01                                  | $1.270 \times 10^{-3}$ | $1.528 \times 10^{-2}$           | $5.033 \times 10^{-2}$            |
| 0.1                                   | $4.160 \times 10^{-3}$ | $1.335 \times 10^{-1}$           | $2.517 \times 10^{-2}$            |
| 0.5                                   | $6.030 \times 10^{-3}$ | $1.307 \times 10^{-1}$           | $1.231 \times 10^{-2}$            |
| 1                                     | $1.234 \times 10^{-2}$ | $1.275 \times 10^{-1}$           | $1.528 \times 10^{-2}$            |
| 5                                     | $1.015 \times 10^{-2}$ | $4.163 \times 10^{-2}$           | $1.513 \times 10^{-1}$            |
| 10                                    | $2.101 \times 10^{-2}$ | $2.082 \times 10^{-2}$           | $4.041 \times 10^{-2}$            |
| 20                                    | $3.372 \times 10^{-2}$ | $2.517 \times 10^{-2}$           | $4.041 \times 10^{-2}$            |
| 30                                    | $5.132 \times 10^{-2}$ | $3.055 \times 10^{-2}$           | $4.940 \times 10^{-1}$            |
| 50                                    | $4.715 \times 10^{-2}$ | $3.753 \times 10^{-1}$           | $2.751 \times 10^{-1}$            |
| 75                                    | $2.347 \times 10^{-1}$ | $2.307 \times 10^{-1}$           | $2.843 \times 10^{-1}$            |
| 100                                   | $2.917 \times 10^{-1}$ | $2.646 \times 10^{-1}$           | $6.265 \times 10^{-1}$            |
| 125                                   | $4.258 \times 10^{-1}$ | $4.163 \times 10^{-1}$           | $5.346 \times 10^{-1}$            |
| 150                                   | $4.979 \times 10^{-1}$ | $8.008 \times 10^{-1}$           | $4.537 \times 10^{-1}$            |
| 200                                   | $8.737 \times 10^{-2}$ | $7.638 \times 10^{-1}$           | $6.331 \times 10^{-1}$            |

**Table S5.** The RSD value of peak current in each day for CAs/GCE-Fe-1000.

| Day | RSD (%)                |
|-----|------------------------|
| 1   | $1.589 \times 10^{-1}$ |
| 2   | $3.129 \times 10^{-1}$ |
| 3   | $1.213 \times 10^{-1}$ |
| 4   | $1.993 \times 10^{-1}$ |
| 5   | $1.836 \times 10^{-1}$ |
| 6   | $1.520 \times 10^{-1}$ |
| 7   | $9.445 \times 10^{-2}$ |
